# Supplementary material
Source: PubMed Central journal article supplement (PMC3536900)
Supplement: supp_M112.019745_Sup_Figure_1_fractionation_schematic.pdf [file supp_M112.019745_Sup_Figure_1_fractionation_schematic.pdf]

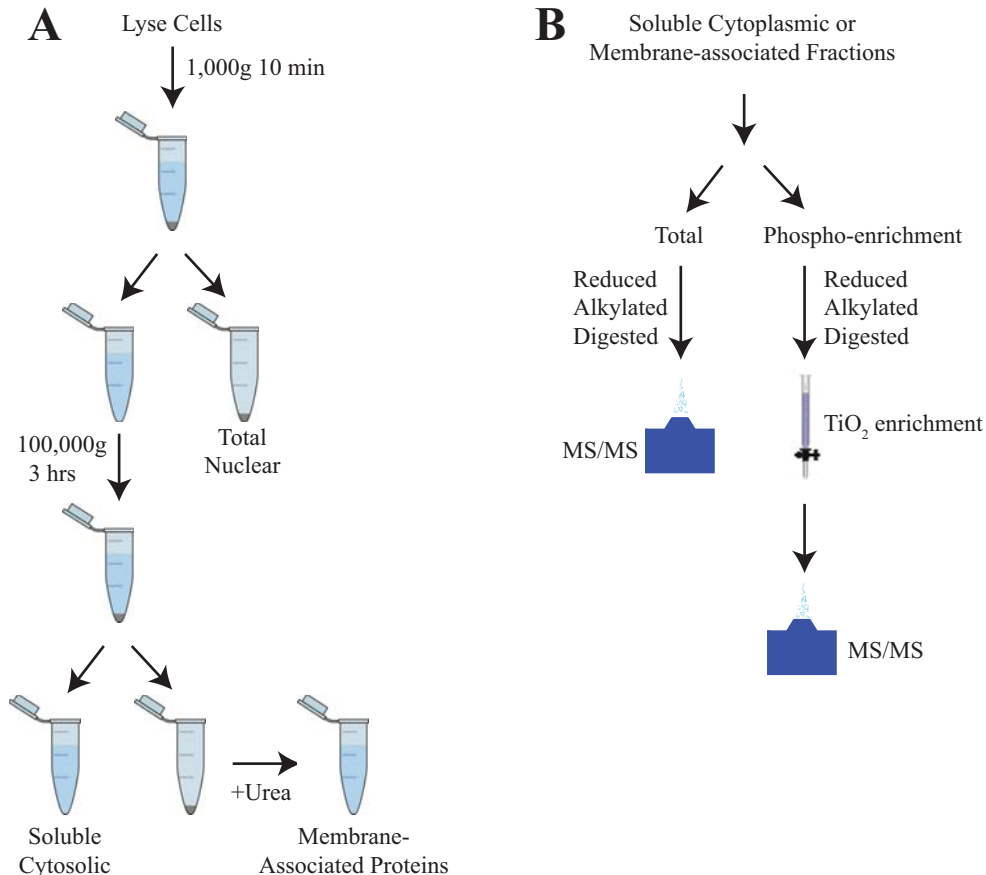

**Supplemental Figure 1. Preparation Scheme for LC-MS/MS Analysis.** (A) Whole cell lysates from cultures grown in the absence or presence of DEX were fractionated into membrane-associated, soluble cytoplasmic, and nuclear fractions using a differential centrifugation scheme as described [27]. The membrane-associated fraction included cell surface and mitochondrial membrane as well as other types of membranes. (B) Flowchart of protocol for LC/MS/MS. Each sample was run three times using biological replicates. One technical replicate was also run.
