# Supplementary material
Source: PubMed Central journal article supplement (PMC3536900)
Supplement: supp_M112.019745_Supplemental_Figure_2_v2.pdf [file supp_M112.019745_Supplemental_Figure_2_v2.pdf]

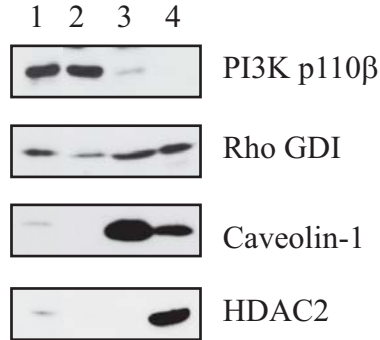

**Supplemental Figure 2. Western Blot Analysis of Fractionation Procedure in the Absence of DEX.** Cell lysates were fractionated using differential centrifugation as outlined in Supplemental Figure 1. Lane 1: whole cell lysate, Lane 2: soluble cytoplasmic fraction, Lane 3: membrane-associated fraction, Lane 4: nuclear fraction. The cytosolic protein marker PI3K p110 $\beta$  is found mainly in the soluble cytoplasmic fraction (Lane 2) with very little in the membrane-associated fraction (Lane 3). The membrane protein marker caveolin-1 was predominantly found in the membrane-associated fraction (Lane 3). As expected, Rho GDI was found found in both the cytoplasmic and membrane-associated fractions. The nuclear marker HDAC2 is only seen in the nuclear fraction (Lane 4). Some caveolin-1 and Rho GDI was also found in the nuclear fraction. For the caveolin-1 blot, the gel was loaded with 2.5  $\mu$ g of protein per lane. For the PI3K p110 $\beta$  blot, the gel was loaded with 5  $\mu$ g of protein per lane. For the Rho GDI or HDAC blot, the gel was loaded with 10  $\mu$ g of protein per lane. Protein levels were determined using a BCA assay. Primary antibodies used were PI3K p110 $\beta$  (Abcam pAb ab32569, 1:500), Rho GDI (Millipore pAb 06-730, 1:2000), caveolin-1 (Abcam pAb ab2910, 1:2000) and HDAC2 (Santa Cruz pAb sc-7899, 1:1000).
